# Supplementary material
Source: PubMed Central journal article supplement (PMC3155818)
Supplement: NIHMS314263-supplement-1_si_001.pdf [file NIHMS314263-supplement-1_si_001.pdf]

# ***Mapping the Hydration Dynamics of Ubiquitin***

Nathaniel V. Nucci, Maxim S. Pometun, and A. Joshua Wand

Johnson Research Foundation and Department of Biochemistry & Biophysics, University of Pennsylvania, 422 Curie Blvd,  
Philadelphia, Pennsylvania 191104-6059

## ***Supplementary Information***

## Materials & Methods

**Sample preparation.** All isotopically labeled compounds were obtained from Cambridge Isotopes Laboratories (Andover, MA). Unlabeled chemicals were purchased from Sigma-Aldrich (St. Louis, MO). Uniformly  $^{15}\text{N}$ ,  $^{13}\text{C}$ - and  $^{15}\text{N}$ ,  $^2\text{H}$  (99%)-labeled ubiquitin were purified as described previously<sup>1</sup> except that minimal media cultures were supplied with deuterated glucose (*d*-7) and grown in 99%  $\text{D}_2\text{O}$  for uniform  $^2\text{H}$ -labeling. The purification protocol involves refolding of ubiquitin, which was performed in  $\text{H}_2\text{O}$  solutions to allow complete exchange of amide deuterons for hydrogens. All reverse micelle samples were made in 75 mM sodium bis-2-ethylhexyl sulfosuccinate (AOT) using 50 mM sodium acetate (*d*-3), pH 5, with 50 mM NaCl.<sup>2,3</sup> All samples had a measured [water]/[surfactant] ratio ( $W_0$ ) of  $9 \pm 0.3$ .  $^{15}\text{N}$ ,  $^2\text{H}$  ubiquitin reverse micelle samples were prepared using deuterated pentane (98% *d*-12) as the bulk organic solvent.  $^{15}\text{N}$ ,  $^{13}\text{C}$ -ubiquitin reverse micelle samples were prepared in liquid propane (98% *d*-8) at 600 psi using specialized apparatus from Daedalus Innovations, LLC (Philadelphia, PA). Aqueous  $^{15}\text{N}$ ,  $^{13}\text{C}$ -ubiquitin samples were composed of 1 mM protein, 50 mM sodium acetate (*d*-3), pH 5, and 50 mM NaCl.

**NMR spectroscopy.** All NMR experiments were performed at 20 °C using Bruker Avance III NMR spectrometers operating at 500 or 600 MHz as indicated and were equipped with cryoprobes. All multidimensional NMR experiments used the States-TPPI<sup>4,5</sup> method for quadrature detection in the incremented time domain(s) unless otherwise indicated. The spectrometer was locked on the methyl deuterium signal of the alkane solvent for reverse micelle samples or on deuterium oxide for aqueous samples. Standard implementations of the sensitivity-enhanced<sup>6</sup>  $^{15}\text{N}$ -resolved NOESY-HSQC,<sup>7,9</sup> and non-sensitivity enhanced  $^{13}\text{C}$ -resolved NOESY-HSQC implemented with the WET sequence for suppression of AOT resonances in the methyl (1.05 p.p.m. and 0.92 p.p.m.) and methylene (1.35 p.p.m.) regions were used. As noted, in some cases these were recorded as  $^{15}\text{N}$  or  $^{13}\text{C}$  projections, respectively. For detection of hydration water, matched three-dimensional  $^{15}\text{N}$ -resolved ROESY<sup>10-12</sup> and  $^{15}\text{N}$ -resolved NOESY spectra were obtained on the same sample. The ROESY experiment employed a 8.33 kHz CW

spin-lock field with the 90x–SLy–90x scheme to minimize spin-lock offset effects<sup>13</sup>. ROESY spectra were recorded on samples prepared in propane for comparison to earlier measurements<sup>14</sup> on samples prepared in pentane. <sup>1</sup>H–<sup>1</sup>H projections of the <sup>15</sup>N-resolved NOESY-HSQC were recorded for each sample at 10, 25, 40, and 75 ms NOE mixing time ( $\tau_{\text{mix}}$ ) to determine the linear region of the NOE and to characterize long-range dipolar interactions between the protein and alkane solvent. <sup>1</sup>H<sub>N</sub> T<sub>1ρ</sub> values were measured using the <sup>15</sup>N–<sup>1</sup>H projection of the three-dimensional ROESY experiment at nine different mixing times ranging from 1 ms to 80 ms with three delays recorded in duplicate for error analysis. NOE/ROE ratios were calculated for those sites which were well resolved from H<sub>α</sub> cross peaks as described previously,<sup>14</sup> and differences from the previously published values were found to be within measurement error (data not shown).

Experiments to measure hydration near aliphatic hydrogens employed the corresponding <sup>13</sup>C-resolved NOESY-HSQC and ROESY-HSQC experiments and were recorded on <sup>15</sup>N,<sup>13</sup>C-ubiquitin in reverse micelles in perdeuterated liquid propane (*d*-8) at 600 MHz using 16 transients, 40 complex increments with gradient selection for quadrature in the indirect <sup>13</sup>C dimension, and 64 complex increments with States-TPPI quadrature detection in the indirect <sup>1</sup>H dimension. <sup>1</sup>H<sub>C</sub> T<sub>1ρ</sub> values were measured from the <sup>13</sup>C–<sup>1</sup>H projection of the three-dimensional <sup>13</sup>C-resolved ROESY experiment at nine different mixing times ranging from 1 ms to 35 ms with three delays recorded in duplicate for error analysis. <sup>13</sup>C – ROESY experiments employed a 10 kHz CW spin-lock field with the 90x–SLy–90x scheme. The spin-lock pulse carrier frequency was moved to -1.0 p.p.m. in order to prevent HOHAHA transfers<sup>15</sup> from contributing to the measured cross peaks. For comparison to the reverse micelle spectra, <sup>13</sup>C-resolved NOESY-HSQC and ROESY-HSQC experiments were recorded on <sup>15</sup>N,<sup>13</sup>C-ubiquitin in aqueous solution at 600 MHz using 32 transients, 32 complex increments with gradient selection in the indirect <sup>13</sup>C dimension and 50 complex increments in the indirect <sup>1</sup>H dimension. The ROESY spin lock was performed as for the reverse micelle sample.

**NMR Data Analysis.** Spectra were processed with FELIX (Accelrys, San Diego, CA) and analyzed with Sparky.<sup>16</sup>  $T_{1\rho}$  values were determined by fitting intensity decays to single exponential functions using NumPy in Python 2.5. NOE/ROE values were calculated using:<sup>17</sup>

$$\frac{\sigma_{NOE}}{\sigma_{ROE}} = \frac{NOE}{ROE} e^{-\frac{\tau_{mix}}{T_{1\rho}}} \quad (1)$$

Where NOE and ROE denote simple maximum peak intensities. In a minority of cases, resolution was insufficient for intensities to be used. In these cases, peaks were fit in SPARKY<sup>16</sup> to determine peak volumes, which were used in place of intensities. The spectral parameter used is indicated in Table 1 where the  $\sigma_{NOE}/\sigma_{ROE}$  ratios are reported.

**Molecular modeling and analysis.** PyMol (Schrödinger, Portland) was used to create molecular images and to overlay molecular structures for analysis of crystallographic waters and for analysis of ubiquitin complexes. The reverse micelle model was created using CNS<sup>18</sup> and visualized using PyMol. Burial depth of each hydration dynamic probe was calculated using the Travel Depth<sup>19,20</sup> suite of programs and was averaged over the 32 structures in the reverse micelle ubiquitin NMR structural ensemble (PDB ID 1G6J<sup>2</sup>). The Cartesian coordinates of the Lee-Richards<sup>21</sup> solvent-accessible molecular surface (SAS) generated by the Travel Depth suite for conformer 25 of the 1G6J ensemble were used to compute the hydration dynamic map of the ubiquitin surface. The distance from each point on the SAS to each hydration dynamics probe was calculated. Each point that was within NOE distance of one or more hydration dynamic probes was assigned an NOE/ROE value corresponding to the simple average of the NOE/ROE values for all of the probes within NOE distance of it. Surface points outside NOE distance from any hydration dynamic probe were not assigned a value. For this analysis, the present <sup>13</sup>C-resolved NOE/ROE values were combined with the previously published <sup>15</sup>N-resolved values obtained in liquid pentane. The NOE maximum distances used were: 3.25 Å for C-Hs, corresponding to the maximum <sup>13</sup>C-resolved NOE distance at 35 ms  $\tau_{mix}$  as calibrated using intramolecular NOEs; 4.25 Å for sites where the position of the carbon atom was used rather than the hydrogen position due to degeneracy of attached

hydrogen chemical shifts, corresponding to the calibrated NOE distance plus 1 Å for the C-H bond; and 4.55 Å for N-Hs, corresponding to the maximum detectable NOE distance calibrated previously.<sup>14</sup>

Comparison of sites of NMR-detected restricted hydration dynamics with crystallographic water locations was performed by aligning conformer 25 of the reverse micelle ubiquitin structural ensemble (PDB ID 1G6J<sup>2</sup>) with two room temperature crystal structures of ubiquitin (PDB IDs 1UBQ<sup>22</sup> and 1UBI<sup>23</sup>). Distances between sites were calculated in PyMol. Comparison of crystal structures of ubiquitin complexes was performed using PyMOL. Conformer 25 of the reverse micelle NMR structural ensemble (PDB ID 1G6J) was aligned with each of the 20 ubiquitin complexes previously analyzed by Lange et al.<sup>24</sup> Details regarding which structures were used are given Table S2.

***Analysis of ubiquitin complexes.*** Eighteen crystal structures of heteromolecular ubiquitin binding complexes were used to examine if there was a correlation between the nature of ubiquitin hydration dynamics and the ubiquitin binding interfaces. The complexes and their PDB ID codes and references are given in Table S2. One ubiquitin molecule in each complex was aligned with conformer 25 of the reverse micelle ubiquitin structural ensemble (PDB ID 1G6J)<sup>2</sup> using PyMOL (Schrödinger, Portland). All non-ubiquitin heavy atoms within 6 Å of conformer 25 of 1G6J were considered to be interfacial atoms of the ubiquitin binding partners. These atoms are those shown as spheres in Figure 3 of the main text.

**Table S1.** Apparent hydration water  $\sigma_{\text{NOE}}/\sigma_{\text{ROE}}$  values and  $T_{1\rho}$  relaxation time constants for  $^1\text{H}$ - $^{13}\text{C}$  probes of hydration in ubiquitin.

| Assignment                  | $\sigma_{\text{NOE}}/\sigma_{\text{ROE}}$<br>( $\pm 0.05$ ) | $T_{1\rho}$ (s) | Assignment                | $\sigma_{\text{NOE}}/\sigma_{\text{ROE}}$<br>( $\pm 0.05$ ) | $T_{1\rho}$ (s) | Assignment                | $\sigma_{\text{NOE}}/\sigma_{\text{ROE}}$<br>( $\pm 0.05$ ) | $T_{1\rho}$ (s) |
|-----------------------------|-------------------------------------------------------------|-----------------|---------------------------|-------------------------------------------------------------|-----------------|---------------------------|-------------------------------------------------------------|-----------------|
| K33 $\text{H}_\gamma 2/3$   | -0.53                                                       | 0.0400          | T14 $\text{H}_\gamma 2^*$ | -0.37                                                       | 0.0292          | R74 $\text{H}_\beta 2^*$  | -0.16                                                       | 0.0188          |
| T7 $\text{H}_\beta$         | -0.49                                                       | 0.0187          | L69 $\text{H}_\beta 2$    | -0.33                                                       | 0.0248          | D32 $\text{H}_\beta 3^*$  | -0.15                                                       | 0.0210          |
| T22 $\text{H}_\alpha$       | -0.47                                                       | 0.0184          | I13 $\text{H}_\gamma 2$   | -0.29                                                       | 0.0289          | K11 $\text{H}_\beta 3^*$  | -0.14                                                       | 0.0203          |
| T7 $\text{H}_\alpha$        | -0.47                                                       | 0.0239          | P19 $\text{H}_\beta 3$    | -0.28                                                       | 0.0182          | P37 $\text{H}_\beta 3$    | -0.12                                                       | 0.0187          |
| K6 $\text{H}_\delta 2/3^*$  | -0.47                                                       | 0.0299          | K33 $\text{H}_\beta 2$    | -0.27                                                       | 0.0184          | K33 $\text{H}_\beta 3^*$  | -0.10                                                       | 0.0237          |
| T9 $\text{H}_\beta$         | -0.45                                                       | 0.0273          | K63 $\text{H}_\beta 3^*$  | -0.27                                                       | 0.0207          | Q62 $\text{H}_\beta 3$    | -0.09                                                       | 0.0192          |
| K33 $\text{H}_\delta 2/3^*$ | -0.45                                                       | 0.0448          | M1 $\text{H}_\beta 3$     | -0.26                                                       | 0.0194          | Q31 $\text{H}_\gamma 3$   | -0.09                                                       | 0.0184          |
| R72 $\text{H}_\gamma 2/3^*$ | -0.43                                                       | 0.0172          | F4 $\text{H}_\beta 2/3^*$ | -0.25                                                       | 0.0198          | F45 $\text{H}_\delta$     | -0.05                                                       | 0.0261          |
| K29 $\text{H}_\eta 3^*$     | -0.42                                                       | 0.0438          | Q49 $\text{H}_\gamma 2$   | -0.24                                                       | 0.0229          | Q2 $\text{H}_\gamma 3^*$  | -0.04                                                       | 0.0255          |
| L8 $\text{H}_\delta 2$      | -0.42                                                       | 0.0442          | M1 $\text{H}_\beta 2$     | -0.21                                                       | 0.0168          | Q2 $\text{H}_\beta 3$     | NQ                                                          | 0.0210          |
| M1 $\text{H}_\gamma 2^*$    | -0.39                                                       | 0.0221          | K29 $\text{H}_\beta 3$    | -0.21                                                       | 0.0155          | E18 $\text{H}_\beta 3$    | NQ                                                          | 0.0203          |
| K11 $\text{H}_\delta 2/3$   | -0.38                                                       | 0.0359          | K29 $\text{H}_\beta 2$    | -0.20                                                       | 0.0168          | K33 $\text{H}_\eta$       | NQ                                                          | 0.0400          |
| T9 $\text{H}_\gamma 2^*$    | -0.38                                                       | 0.0293          | K63 $\text{H}_\eta 2/3^*$ | -0.18                                                       | 0.0373          | R42 $\text{H}_\gamma 2/3$ | NQ                                                          | 0.0176          |
| Q41 $\text{H}_\beta 2^*$    | -0.38                                                       | 0.0178          | Q62 $\text{H}_\beta 2^*$  | -0.17                                                       | 0.0194          | I44 $\text{H}_\gamma 2$   | NQ                                                          | 0.0254          |

$\sigma_{\text{NOE}}/\sigma_{\text{ROE}}$  values were calculated as described in Materials and Methods. \*indicates sites for which fitted peak volumes were used in lieu of intensities. NQ indicates sites which were not quantitative, representing sites where cross relaxation to water was observed but was not quantified due to insufficient quality of the data. In most cases, this was the result of overlap with surfactant signals. Error for  $T_{1\rho}$  was less  $\leq 2\%$  for all sites.

**Table S2.** Crystal structures used for analysis ubiquitin heteromolecular complexes.

| PDB ID | Ubiquitin Binding Partner                                      | Reference |
|--------|----------------------------------------------------------------|-----------|
| 2G45   | Zinc-finger ubiquitin-binding domain of isopeptidase T (USP5)  | 25        |
| 1CMX   | Yeast ubiquitin C-terminal hydrolase, Yuhl                     | 26        |
| 1NBF   | UBP-family deubiquitinating enzyme                             | 27        |
| 1OTR   | Yeast Cue 2 protein                                            | 28        |
| 1P3Q   | Vacuolar protein sorting-associated protein VPS9P, Cue domain  | 29        |
| 1S1Q   | Vacuolar protein sorting-associated protein TSG101, UEV domain | 30        |
| 1UZX   | Vacuolar protein sorting-associated protein VPS23              | 31        |
| 1WR1   | Ubiquitin-associated domain of Dsk2p                           | 32        |
| 1WR6   | Human GGA3 C-GAT                                               | 33        |
| 1WRD   | GAT domain of Tom-1                                            | 34        |
| 1XD3   | Human ubiquitin C-terminal hydrolase, L3                       | 35        |
| 1YD8   | GAT domain of human GGA3                                       | 36        |
| 2AYO   | Ubiquitin-specific processing protease, USP14                  | 37        |
| 2C7M   | Guanine nucleotide-exchange factor, Rabex-5                    | 38        |
| 2C7N   | Guanine nucleotide-exchange factor, Rabex-5                    | 38        |
| 2D3G   | Ubiquitin-interacting motif of Hrs                             | 39        |
| 2FID   | Guanine nucleotide-exchange factor, Rabex-5                    | 40        |
| 2FIF   | Guanine nucleotide-exchange factor, Rabex-5                    | 40        |

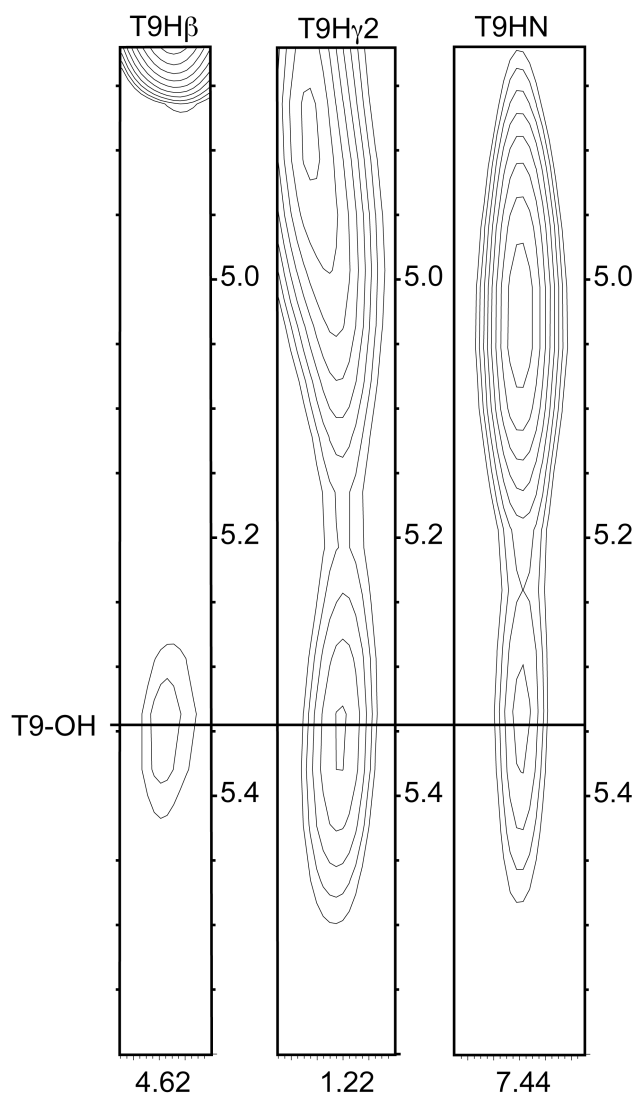

**Figure S1.** Intramolecular cross peaks to side chain hydroxyl hydrogens. Cross peaks are shown in  $^1\text{H}$ - $^1\text{H}$  strip plots from  $^{13}\text{C}$ - and  $^{15}\text{N}$ -resolved NOESY spectra with the directly-detected dimension on the abscissa and the indirect  $^1\text{H}$  dimension on the ordinate axis. These cross peaks are to the hydroxyl hydrogen of Thr-9 demonstrating that the hydroxyl hydrogen is resolved from the water resonance and therefore in slow exchange. The slight variation in chemical shift of the cross peak is within the digital resolution of the spectra. This and similar interactions involving other side chain hydroxyl hydrogens demonstrate that hydrogen exchange in reverse micelles is effectively quenched by more than two orders of magnitude relative to free aqueous solution.

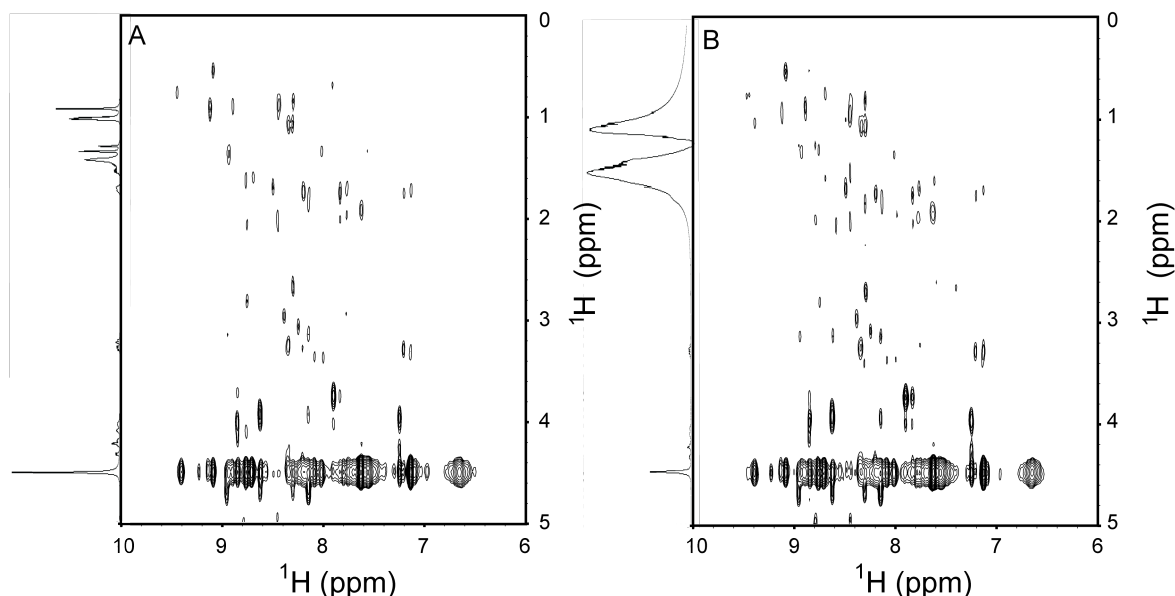

**Figure S2.** Demonstration of the absence of long-range protein-alkane solvent dipolar coupling.  $^1\text{H}$ - $^1\text{H}$  NOESY projections of  $^{15}\text{N}$ -resolved NOESY experiments are shown for uniformly  $^{15}\text{N}$ ,  $^2\text{H}$ -labeled ubiquitin encapsulated in AOT reverse micelles in (A) 98% perdeuterated pentane or in (B) 10% perdeuterated, 90%  $^1\text{H}$ -pentane. One-dimensional  $^1\text{H}$  spectra of each sample are shown vertically on the left of each spectrum. The contribution of the  $^1\text{H}$ -pentane in (B) is evident in the one-dimensional spectrum yet no increase in cross peak intensity is seen in the NOESY projection. This confirms the absence of long-range coupling between the protein and alkane solvent hydrogens.

## References

- (1) Peterson, R. W.; Pometun, M. S.; Shi, Z.; Wand, A. J. *Protein Sci* 2005, 14, 2919.
- (2) Babu, C. R.; Flynn, P. F.; Wand, A. J. *J. Am. Chem. Soc.* 2001, 123, 2691.
- (3) Wand, A. J.; Ehrhardt, M. R.; Flynn, P. F. *Proc. Natl. Acad. Sci. U. S. A.* 1998, 95, 15299.
- (4) Marion, D.; Wuthrich, K. *Biochem. Biophys. Res. Comm.* 1983, 113, 967.
- (5) States, D. J.; Haberkorn, R. A.; Ruben, D. J. *J. Magn. Reson.* 1982, 48, 286.
- (6) Palmer, A. G., III; Cavanagh, J.; Wright, P. E.; Rance, M. J. *Magn. Reson.* 1991, 93, 151.
- (7) Kay, L. E.; Keifer, P.; Saarinen, T. J. *Am. Chem. Soc.* 1992, 114, 10663.
- (8) Schleucher, J.; Schwendinger, M.; Sattler, M.; Schmidt, P.; Schedletsky, O.; Glaser, S. J.; Sorensen, O. W.; Griesinger, C. J. *Biomol. NMR* 1994, 4, 301.
- (9) Zhang, O.; Kay, L. E.; Olivier, J. P.; Forman-Kay, J. D. *J. Biomol. NMR* 1994, 4, 845.
- (10) Bax, A.; Davis, D. G. *J. Magn. Reson.* 1985, 63, 207.
- (11) Bothner-By, A. A.; Stephens, R. L.; Lee, J.; Warren, C. D.; Jeanloz, R. W. *J. Am. Chem. Soc.* 1984, 106, 811.
- (12) Clore, G. M.; Bax, A.; Wingfield, P. T.; Gronenborn, A. M. *Biochemistry* 1990, 29, 5671.
- (13) Griesinger, C.; Ernst, R. R. *J. Magn. Reson.* 1987, 75, 261.
- (14) Nucci, N. V.; Pometun, M. S.; Wand, A. J. *Nat. Struct. Mol. Biol.* 2011, 18, 245.
- (15) Desvaux, H.; Berthault, P.; Birlirakis, N.; Goldman, M. J. *Magn. Reson. Series A* 1994, 108, 219.
- (16) Goddard, T. D.; Kneller, D. G.; University of California, San Francisco: San Francisco, CA.
- (17) Macura, S.; Huang, Y.; Suter, D.; Ernst, R. R. *Journal of Magnetic Resonance* 1981, 43, 259.
- (18) Brunger, A. T.; Adams, P. D.; Clore, G. M.; DeLano, W. L.; Gros, P.; Grosse-Kunstleve, R. W.; Jiang, J. S.; Kuszewski, J.; Nilges, M.; Pannu, N. S.; Read, R. J.; Rice, L. M.; Simonson, T.; Warren, G. L. *Acta Crystall.* 1998, D54, 905.
- (19) Coleman, R. G.; Sharp, K. A. *J. Mol. Biol.* 2006, 362, 441.
- (20) Coleman, R. G.; Sharp, K. A. *Proteins* 2009, 78.
- (21) Lee, B.; Richards, F. M. *J. Mol. Biol.* 1971, 55, 379.

- (22) Vijay-Kumar, S.; Bugg, C. E.; Cook, W. J. J. *Mol. Biol.* 1987, 194, 531.
- (23) Alexeev, D.; Bury, S. M.; Turner, M. A.; Ogunjobi, O. M.; Muir, T. W.; Ramage, R.; Sawyer, L. *Biochem. J.* 1994, 299, 159.
- (24) Lange, O. F.; Lakomek, N. A.; Fares, C.; Schroder, G. F.; Walter, K. F. A.; Becker, S.; Meiler, J.; Grubmuller, H.; Griesinger, C.; de Groot, B. L. *Science* 2008, 320, 1471.
- (25) Reyes-Turcu, F. E.; Horton, J. R.; Mullally, J. E.; Heroux, A.; Cheng, X. D.; Wilkinson, K. D. *Cell* 2006, 124, 1197.
- (26) Johnston, S. C.; Riddle, S. M.; Cohen, R. E.; Hill, C. P. *Embo Journal* 1999, 18, 3877.
- (27) Hu, M.; Li, P. W.; Li, M. Y.; Li, W. Y.; Yao, T. T.; Wu, J. W.; Gu, W.; Cohen, R. E.; Shi, Y. G. *Cell* 2002, 111, 1041.
- (28) Kang, R. S.; Daniels, C. M.; Francis, S. A.; Shih, S. C.; Salerno, W. J.; Hicke, L.; Radhakrishnan, I. *Cell* 2003, 113, 621.
- (29) Prag, G.; Misra, S.; Jones, E. A.; Ghirlando, R.; Davies, B. A.; Horazdovsky, B. F.; Hurley, J. H. *Cell* 2003, 113, 609.
- (30) Sundquist, W. I.; Schubert, H. L.; Kelly, B. N.; Hill, G. C.; Holton, J. M.; Hill, C. P. *Mol. Cell* 2004, 13, 783.
- (31) Teo, H.; Vepintsev, D. B.; Williams, R. L. *J. Biol. Chem.* 2004, 279, 28689.
- (32) Ohno, A.; Jee, J.; Fujiwara, K.; Tenno, T.; Goda, N.; Tochio, H.; Kobayashi, H.; Hiroaki, H.; Shirakawa, M. *Structure* 2005, 13, 521.
- (33) Kawasaki, M.; Shiba, T.; Shiba, Y.; Yamaguchi, Y.; Matsugaki, N.; Igarashi, N.; Suzuki, M.; Kato, R.; Kato, K.; Nakayama, K.; Wakatsuki, S. *Genes to Cells* 2005, 10, 639.
- (34) Akutsu, M.; Kawasaki, M.; Katoh, Y.; Shiba, T.; Yamaguchi, Y.; Kato, R.; Kato, K.; Nakayama, K.; Wakatsuki, S. *Febs Letters* 2005, 579, 5385.
- (35) Misaghi, S.; Galardy, P. J.; Meester, W. J. N.; Ova, H.; Ploegh, H. L.; Gaudet, R. J. *Biol. Chem.* 2005, 280, 1512.
- (36) Prag, G.; Lee, S. H.; Mattera, R.; Arighi, C. N.; Beach, B. M.; Bonifacino, J. S.; Hurley, J. H. *Proc. Nat. Acad. Sci. U.S.A.* 2005, 102, 2334.
- (37) Hu, M.; Li, P. W.; Song, L.; Jeffrey, P. D.; Chernova, T. A.; Wilkinson, K. D.; Cohen, R. E.; Shi, Y. G. *EMBO J.* 2005, 24, 3747.
- (38) Penengo, L.; Mapelli, M.; Murachelli, A. G.; Confalonieri, S.; Magri, L.; Musacchio, A.; Di Fiore, P. P.; Polo, S.; Schneider, T. R. *Cell* 2006, 124, 1183.
- (39) Hirano, S.; Kawasaki, M.; Ura, H.; Kato, R.; Raiborg, C.; Stenmark, H.; Wakatsuki, S. *Nature Struct. Mol. Biol.* 2006, 13, 272.
- (40) Lee, S.; Tsai, Y. C.; Mattera, R.; Smith, W. J.; Kostelansky, M. S.; Weissman, A. M.; Bonifacino, J. S.; Hurley, J. H. *Nature Struct. Mol. Biol.* 2006, 13, 264.
